# Supplementary material
Source: Springer Nature journal article supplement (https://www.springermedizin.de/resource/supplementary/12881_2009_603_MOESM1_ESM.pdf/9451040)

A

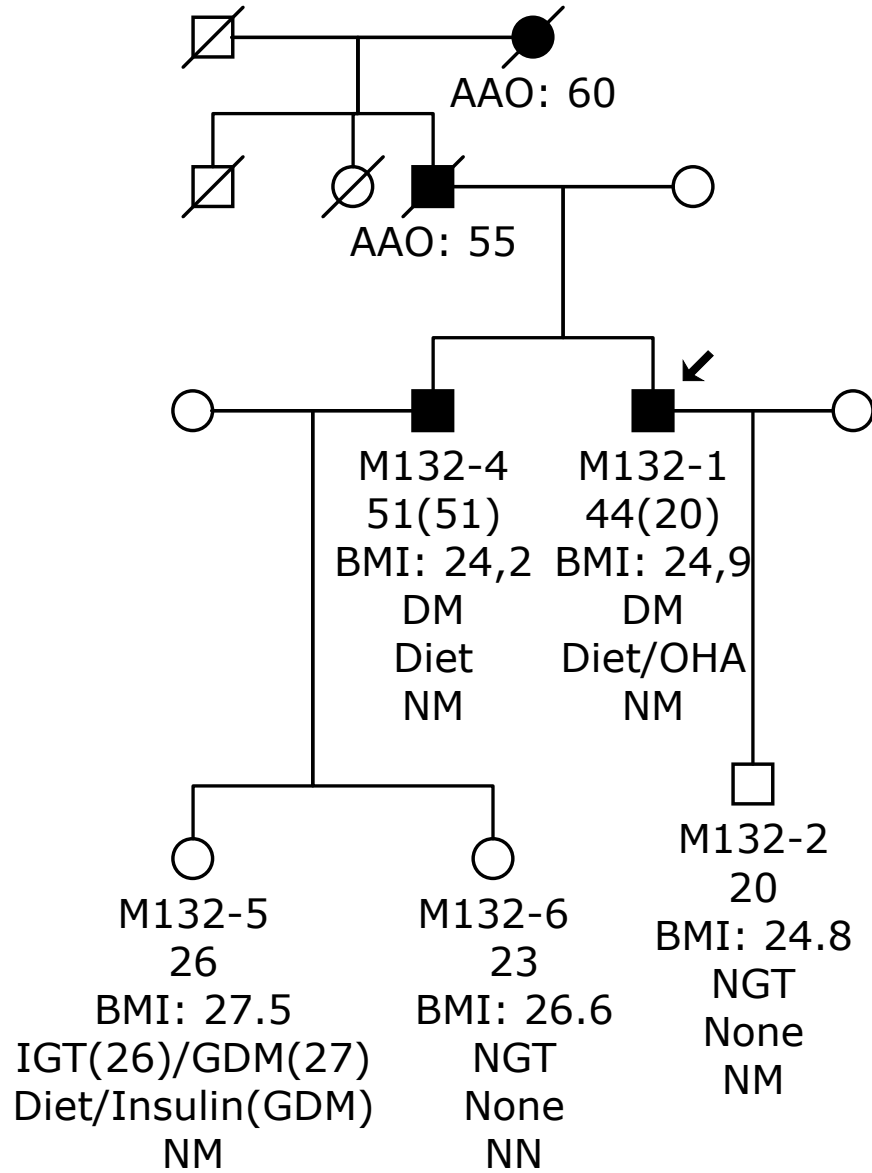

B

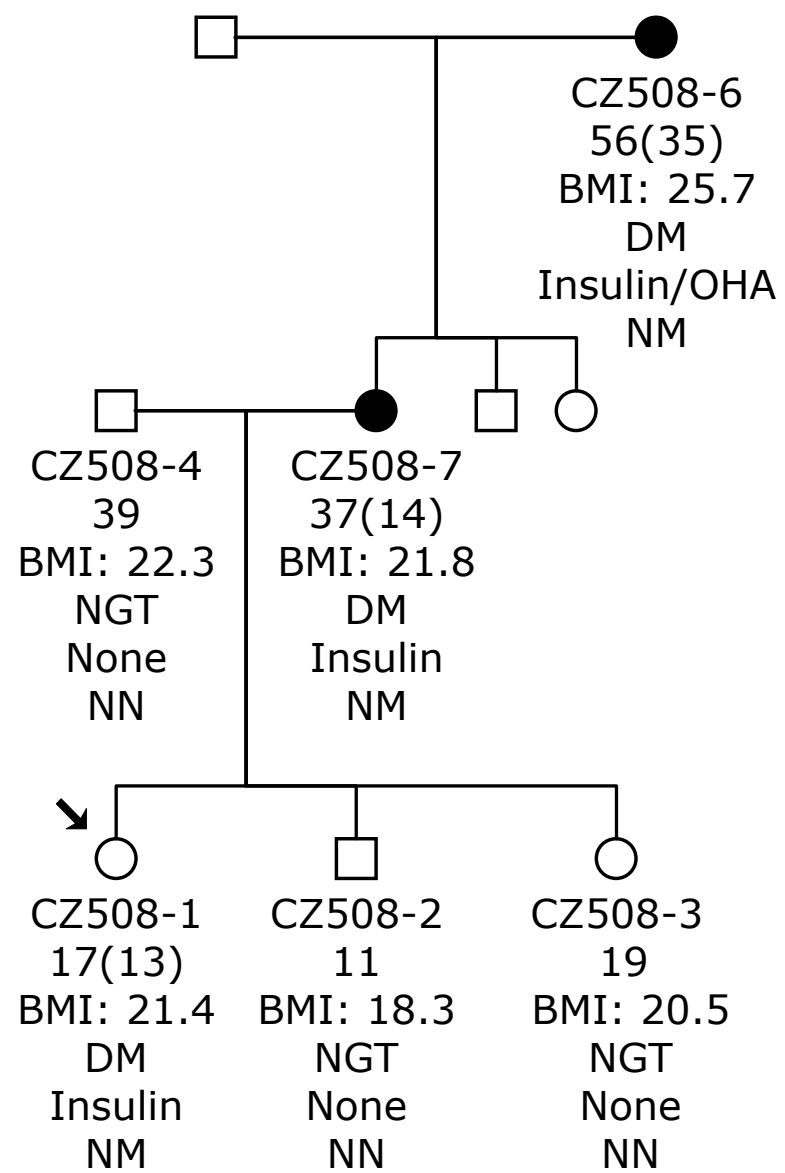

Supplement: MOESM1 [file 9451040]
